# Supplementary material for: HBV&nbsp;Infection Statuses Indicate Different Risks of Synchronous and Metastasis Liver Metastasis in Colorectal Cancer
Source: Research Square preprint supplement (doi:10.21203/rs.3.rs-285576/v1), 2021-03-15
Supplement: Supplementary file 1 [file b2e07e6fca7b9423cadb8fa7.docx]

| Supplementary Table 1. The relationship between anti-HBs and incidence of SYN-CRLM | | | | | |
| --- | --- | --- | --- | --- | --- |
|  | anti-HBs positive | (%) | anti-HBs negative | (%) | P value |
| SYN-CRLM | 225 | 52.9 | 200 | 47.1 |  |
| no SYN-CRLM | 1562 | 57.7 | 1145 | 42.3 | 0.07 |

| Supplementary Table 2. The relationship between anti-HBs and incidence of MET-CRLM | | | | | |
| --- | --- | --- | --- | --- | --- |
|  | anti-HBs positive | (%) | anti-HBs negative | (%) | P value |
| MET-CRLM | 220 | 54.5 | 184 | 45.5 |  |
| no MET-CRLM | 1296 | 58.6 | 915 | 41.4 | 0.12 |

| Supplementary Table 3. Liver and extrahepatic metastasis between different HBV infection groups | | | |
| --- | --- | --- | --- |
|  | extrahepatic metastasis | liver metastasis | P value |
| group A | 62 | 351 |  |
| group B | 70 | 568 |  |
| group C | 297 | 1784 | 0.07 |

| Supplementary Table 4. The relationship between extrahepatic metastasis and HBV infection | | | | |
| --- | --- | --- | --- | --- |
|  | group A | group B | group C | P value |
| lung metastasis | 12 | 26 | 72 |  |
| without lung metastasis | 253 | 460 | 1368 | 0.88 |
|  |  |  |  |  |
| peritoneal metastasis | 9 | 24 | 61 |  |
| without peritoneal metastasis | 256 | 462 | 1379 | 0.6 |
|  |  |  |  |  |
| metastasis of other organs | 7 | 20 | 50 |  |
| without metastasis of other organs | 258 | 466 | 1390 | 0.57 |

| Supplementary Table 5. The 5-year overall survival rate in TNM staging 0 to 4 | | | | |
| --- | --- | --- | --- | --- |
| TNM staging | group A | group B | group C | P value |
| 0 | 100 | 100 | 97.7 | 0.59 |
| 1 | 93.8 | 94.5 | 97.7 | 0.16 |
| 2 | 89.7 | 90.1 | 89.4 | 0.77 |
| 3 | 74.6 | 79.4 | 80.9 | 0.38 |
| 4 | 43 | 38.1 | 50.2 | 0.11 |
